# Supplementary material for: Alpha-Ketoglutarate: An Effective Feed Supplement in Improving Bone Metabolism and Muscle Quality of Laying Hens: A Preliminary Study
Source: PubMed Central journal article supplement (PMC7767309; doi:10.3390/ani10122420), 2020-12-17
Supplement: animals-10-02420-s001.pdf [file animals-10-02420-s001.pdf]

## Supplementary material

**Table S1.** Composition and nutrient content of pre-experimental, pre-laying diet, g/kg dry matter.

| <b>Ingredients</b>                       | <b>Content</b> |
|------------------------------------------|----------------|
| <i>Ingredient (g/kg)</i>                 |                |
| Corn                                     | 320            |
| Wheat                                    | 353            |
| Soybean meal                             | 220            |
| Alfalfa meal                             | 20.0           |
| Rapeseed oil                             | 6.00           |
| Limestone                                | 53,5           |
| Monocalcium phosphate                    | 13.0           |
| NaCl                                     | 3.00           |
| DL-Methionine                            | 1.50           |
| Vitamin-mineral premix <sup>1</sup>      | 10.0           |
| <i>Nutrients composition</i>             |                |
| Metabolizable energy, MJ/kg <sup>2</sup> | 11.50          |
| Crude protein                            | 175.00         |
| Lys                                      | 8.40           |
| Met                                      | 4.20           |
| Ca                                       | 22.5           |
| Available P                              | 4.10           |

<sup>1</sup>The premix provided per 1 kg of diet: vitamin A, 10,000 IU; vitamin D3, 3,000 IU; vitamin E, 50 IU; vitamin K3, 2 mg; vitamin B1, 1 mg; vitamin B2, 4 mg; vitamin B6, 1.5 mg; vitamin B12, 0.01 mg; Ca-pantotenate, 8 mg; niacin, 25 mg; folic acid, 0.5 mg; choline chloride, 250 mg; manganese, 100 mg; zinc, 50 mg; iron, 50 mg; copper, 8 mg; iodine, 0.8 mg; selenium, 0.2 mg, cobalt, 0.2 mg.; <sup>2</sup>Calculated according to European Table [33] as a sum of the ME content of components.

**Table S2.** The calculated amino acids content in the experimental basal diet for laying hens.

| <b>Amino Acid</b>        | <b>Content, g/kg</b> |
|--------------------------|----------------------|
| Lysine                   | 8.35                 |
| Methionine               | 4.10                 |
| Methionine + Cysteine    | 7,2                  |
| Tryptophan               | 2.0                  |
| Threonine                | 6.3                  |
| Isoleucine               | 4.5                  |
| Leucine                  | 7.1                  |
| Valine                   | 14.5                 |
| Phenylalanine + Tyrosine | 8.0                  |
